# Supplementary material
Source: bioRxiv or medRxiv preprint supplement (https://www.biorxiv.org/highwire/filestream/69036/field_highwire_adjunct_files/10/216754-19.pdf)
Supplement: Supplementary file [file 216754-19.pdf]

Supplementary Table 10: Cancer driver genes and enrichment results of the histone subnetwork ranked by number of modules each driver gene is participating in.

**Regulators**

|           | M31 BLCA | M13 BRCA | M26 COADREAD | M33 GBM | M80 HNSC | M87 KIRC | M93 LAML | M51 LUAD | M84 LUSC | M39 OV | M10 UCEC |
|-----------|----------|----------|--------------|---------|----------|----------|----------|----------|----------|--------|----------|
| HIST1H2AE | 1        | 1        | 1            | 0       | 0        | 0        | 0        | 1        | 1        | 0      | 1        |
| HIST1H3G  | 1        | 0        | 1            | 0       | 1        | 0        | 0        | 0        | 0        | 0      | 0        |
| HIST1H2BJ | 0        | 1        | 0            | 0       | 0        | 0        | 0        | 1        | 1        | 0      | 0        |
| HIST1H3H  | 0        | 1        | 0            | 0       | 0        | 1        | 0        | 0        | 1        | 0      | 0        |
| ENSA      | 0        | 1        | 0            | 0       | 0        | 0        | 0        | 0        | 1        | 0      | 0        |
| HIST1H1D  | 0        | 1        | 0            | 0       | 0        | 0        | 0        | 0        | 1        | 0      | 0        |
| HIST1H3D  | 0        | 1        | 0            | 0       | 0        | 0        | 0        | 1        | 0        | 0      | 0        |
| FIG4      | 0        | 0        | 0            | 0       | 0        | 1        | 0        | 1        | 0        | 0      | 0        |

**Gene enrichment**

| Gene sets                                  | M31 BLCA | M13 BRCA | M26 COADREAD | M33 GBM  | M80 HNSC | M87 KIRC | M93 LAML | M51 LUAD | M84 LUSC | M39 OV   | M10 UCEC | # significant enrichments | Averaged p-value |
|--------------------------------------------|----------|----------|--------------|----------|----------|----------|----------|----------|----------|----------|----------|---------------------------|------------------|
| KEGG_SYSTEMIC_LUPUS_ERYTHEMATOSUS          | 6.76E-33 | 8.12E-54 | 1.04E-26     | 1.74E-21 | 5.51E-16 | 3.78E-25 | 3.75E-34 | 4.18E-32 | 5.28E-29 | 1.19E-46 | 8.83E-30 | 11                        | 2.40E-03         |
| REACTOME_MEIOSIS                           | 2.24E-31 | 6.04E-41 | 6.53E-25     | 1.53E-17 | 9.61E-17 | 8.63E-15 | 7.11E-23 | 2.90E-27 | 7.01E-19 | 1.20E-33 | 4.46E-31 | 11                        | 8.67E-06         |
| REACTOME_CELL_CYCLE                        | 1.44E-11 | 3.09E-20 | 5.32E-09     | 2.84E-11 | 3.91E-05 | 4.03E-04 | 1.27E-09 | 1.32E-10 | 6.74E-07 | 3.30E-20 | 5.31E-13 | 11                        | 2.00E-06         |
| REACTOME_RNA_POL_I_TRANSCRIPTION           | 2.29E-33 | 1.23E-43 | 1.67E-26     | 2.47E-16 | 8.02E-18 | 7.23E-16 | 1.36E-24 | 5.50E-29 | 3.27E-20 | 3.46E-36 | 6.19E-33 | 11                        | 2.83E-04         |
| REACTOME_TRANSCRIPTION                     | 4.83E-27 | 3.72E-35 | 1.99E-21     | 1.72E-12 | 2.30E-14 | 2.05E-12 | 4.01E-19 | 1.69E-23 | 5.87E-16 | 3.58E-28 | 5.02E-27 | 11                        | 6.98E-11         |
| REACTOME_RNA_POL_I_RNA_POL_III_AND_MITOCH  | 5.31E-31 | 1.92E-40 | 1.30E-24     | 6.62E-15 | 1.54E-16 | 1.38E-14 | 1.50E-22 | 6.13E-27 | 1.25E-18 | 3.60E-33 | 9.96E-31 | 11                        | 6.67E-07         |
| REACTOME_CHROMOSOME_MAINTENANCE            | 1.37E-17 | 1.08E-29 | 6.65E-14     | 2.73E-17 | 2.21E-08 | 2.36E-07 | 1.31E-15 | 4.54E-16 | 3.10E-11 | 8.62E-31 | 4.87E-19 | 11                        | 8.60E-06         |
| REACTOME_DEPOSITION_OF_NEW_CENPA_CONTAI    | 7.39E-21 | 5.96E-35 | 1.52E-16     | 7.44E-18 | 4.14E-10 | 4.45E-09 | 7.15E-19 | 5.07E-19 | 1.45E-13 | 9.59E-37 | 2.61E-22 | 11                        | 9.41E-06         |
| REACTOME_RNA_POL_I_PROMOTER_OPENING        | 3.56E-36 | 1.76E-47 | 9.93E-29     | 5.29E-18 | 2.57E-19 | 2.32E-17 | 5.24E-27 | 2.10E-31 | 4.58E-22 | 8.20E-40 | 1.51E-35 | 11                        | 4.23E-05         |
| REACTOME_MEIOTIC_RECOMBINATION             | 1.25E-33 | 5.45E-44 | 1.04E-26     | 4.82E-19 | 5.81E-18 | 5.23E-16 | 8.08E-25 | 3.27E-29 | 2.19E-20 | 1.60E-36 | 3.53E-33 | 11                        | 3.54E-12         |
| REACTOME_MEIOTIC_SYNOPSIS                  | 3.53E-20 | 7.61E-34 | 5.36E-16     | 3.04E-17 | 9.39E-10 | 1.01E-08 | 3.41E-18 | 2.07E-18 | 4.40E-13 | 1.74E-35 | 1.25E-21 | 11                        | 3.66E-05         |
| REACTOME_AMYLOIDS                          | 6.71E-34 | 2.33E-44 | 6.30E-27     | 1.19E-16 | 4.15E-18 | 3.74E-16 | 4.72E-25 | 1.91E-29 | 1.45E-20 | 7.17E-37 | 1.97E-33 | 11                        | 1.70E-08         |
| REACTOME_PACKAGING_OF_TELOMERE_ENDS        | 2.26E-22 | 1.85E-37 | 9.31E-18     | 3.23E-19 | 6.79E-11 | 7.32E-10 | 2.19E-20 | 2.20E-20 | 1.24E-14 | 1.29E-39 | 7.95E-24 | 11                        | 1.54E-08         |
| REACTOME_TELOMERE_MAINTENANCE              | 4.85E-20 | 1.28E-33 | 6.93E-16     | 9.69E-20 | 1.11E-09 | 1.19E-08 | 4.68E-18 | 2.77E-18 | 5.51E-13 | 3.13E-35 | 1.72E-21 | 11                        | 8.80E-06         |
| ACEVEDO_LIVER_CANCER_WITH_H3K27ME3_DN      | 1.74E-06 | 1.27E-22 | 2.99E-07     | 4.11E-10 | 9.84E-07 | 1.00E-07 | 1.49E-12 | 4.99E-09 | 4.99E-09 | 1.20E-15 | 1.23E-13 | 11                        | 1.70E-08         |
| 18172295-SuppTable3                        | 3.38E-08 | 1.99E-11 | 1.36E-05     | 1.13E-04 | 1        | 6.19E-10 | 2.74E-08 | 6.48E-13 | 6.48E-13 | 9.33E-11 | 1.36E-05 | 10                        | 2.45E-10         |
| HELLER_HDAC_TARGETS_SILENCED_BY_METHYLA    | 2.54E-09 | 5.06E-14 | 4.04E-05     | 9.58E-06 | 1        | 2.35E-11 | 3.42E-09 | 3.28E-14 | 3.67E-12 | 2.27E-11 | 1.20E-08 | 10                        | 8.23E-07         |
| 18798265-tableS2                           | 3.91E-10 | 8.35E-15 | 1.23E-06     | 1        | 1        | 2.87E-09 | 4.50E-05 | 8.50E-11 | 1.40E-08 | 6.44E-11 | 4.74E-11 | 9                         | 1.74E-08         |
| HELLER_HDAC_TARGETS_UP                     | 1.73E-05 | 8.91E-11 | 3.00E-06     | 1        | 1        | 1.06E-08 | 6.22E-06 | 7.68E-12 | 8.18E-10 | 2.29E-10 | 1.81E-04 | 9                         | 8.61E-06         |
| 18172295-SuppTable2                        | 2.83E-04 | 8.81E-10 | 9.29E-07     | 1        | 1        | 3.12E-07 | 6.79E-05 | 1.79E-10 | 1.79E-10 | 1.33E-09 | 1        | 8                         | 1.35E-05         |
| 15489886-TableS1a                          | 1.47E-03 | 2.99E-10 | 1            | 1        | 1        | 1.44E-04 | 4.59E-04 | 2.21E-09 | 1.05E-05 | 7.83E-07 | 3.49E-04 | 8                         | 2.01E-09         |
| GEORGANTAS_HSC_MARKERS                     | 1.61E-12 | 1.03E-15 | 1            | 1        | 1        | 8.49E-09 | 1.66E-13 | 8.20E-16 | 1.17E-10 | 9.07E-12 | 4.11E-16 | 8                         | 1.43E-03         |
| EGFR_UP.V1_DN                              | 4.12E-05 | 3.41E-11 | 1            | 9.69E-09 | 1        | 3.93E-06 | 1        | 1.56E-07 | 1.43E-05 | 9.14E-15 | 9.61E-06 | 8                         | 4.67E-07         |
| MEK_UP.V1_DN                               | 4.25E-05 | 2.71E-09 | 1            | 5.81E-05 | 1        | 4.05E-06 | 1        | 1.48E-05 | 1.48E-05 | 4.00E-11 | 9.91E-06 | 8                         | 9.68E-06         |
| STK33_SKM_UP                               | 7.86E-06 | 2.56E-11 | 1            | 1        | 1        | 4.57E-07 | 5.51E-08 | 2.45E-12 | 2.93E-10 | 8.69E-08 | 9.22E-05 | 8                         | 1.07E-05         |
| HADDAD_B_LYMPHOCYTE_PROGENITOR             | 4.81E-04 | 1.06E-07 | 1            | 1.46E-05 | 1        | 1        | 1.26E-04 | 3.74E-08 | 1.69E-04 | 3.52E-09 | 1        | 7                         | 6.87E-05         |
| 16109776-TableS1                           | 5.12E-03 | 4.99E-02 | 1            | 1        | 1        | 1        | 4.05E-02 | 1.82E-03 | 1.82E-03 | 1        | 1        | 5                         | 5.84E-06         |
| 18757322-TableS3                           | 1        | 1.16E-05 | 1            | 1        | 1        | 1        | 1        | 4.72E-08 | 1.11E-04 | 5.83E-03 | 1        | 4                         | 9.64E-09         |
| 19429869-TableS1                           | 1        | 2.43E-05 | 1            | 1.45E-06 | 1        | 1        | 1        | 6.01E-04 | 1        | 1.00E-06 | 1        | 4                         | 1.40E-04         |
| 15459216-TableA2e                          | 1        | 6.43E-22 | 1            | 1        | 1        | 1        | 7.57E-14 | 6.01E-13 | 1        | 2.66E-17 | 1        | 4                         | 9.26E-06         |
| DEURIG_T_CELL_PROLYMPHOCYTIC_LEUKEMIA_UP   | 1        | 7.85E-04 | 1            | 2.55E-03 | 1        | 1        | 1.51E-02 | 1        | 1        | 2.83E-05 | 1        | 4                         | 5.99E-05         |
| GSE13411_PLASMA_CELL_VS_MEMORY_BCELL_UP    | 1        | 1.15E-05 | 1            | 6.76E-05 | 1        | 1        | 1.60E-07 | 1        | 1        | 1.25E-07 | 1        | 4                         | 2.31E-07         |
| GSE29618_MONOCYTE_VS_MDC_DN                | 1        | 1.15E-05 | 1            | 1.24E-08 | 1        | 1        | 4.14E-04 | 1        | 1        | 1.25E-07 | 1        | 4                         | 2.78E-03         |
| 18362358-Table10                           | 1        | 9.58E-04 | 1            | 8.78E-05 | 1        | 1        | 1        | 1        | 1        | 3.66E-05 | 1        | 3                         | 2.53E-04         |
| 18487511-TableS1                           | 1        | 5.47E-06 | 1            | 2.62E-11 | 1        | 1        | 1        | 1        | 1        | 1.23E-12 | 1        | 3                         | 4.74E-11         |
| 17823660-TableS2                           | 1        | 1.49E-04 | 1            | 1        | 1        | 1        | 1        | 2.36E-03 | 1        | 4.51E-02 | 1        | 3                         | 1.89E-09         |
| GAZDA_DIAMOND_BLACKFAN_ANEMIA_ERYTHROI     | 1        | 5.55E-03 | 1            | 5.23E-04 | 1        | 1        | 1        | 1        | 1        | 5.40E-03 | 1        | 3                         | 1.54E-08         |
| DAZARD_RESPONSE_TO_UV_NHEK_UP              | 1        | 1        | 1            | 2.21E-04 | 1        | 1        | 1.34E-03 | 1        | 1        | 6.63E-04 | 1        | 3                         | 1.95E-04         |
| ACEVEDO_LIVER_CANCER_WITH_H3K9ME3_DN       | 1        | 1.70E-15 | 1            | 1        | 1        | 1        | 2.44E-07 | 1        | 1        | 8.24E-08 | 1        | 3                         | 2.50E-05         |
| GSE29618_MONOCYTE_VS_MDC_DAY7_FLU_VACCIN   | 1        | 1.15E-05 | 1            | 6.76E-05 | 1        | 1        | 1        | 1        | 1        | 1.25E-07 | 1        | 3                         | 9.27E-08         |
| GSE29618_LAIV_VS_TIV_FLU_VACCINE_DAY7_PDC_ | 1        | 1.15E-05 | 1            | 6.76E-05 | 1        | 1        | 1        | 1        | 1        | 1.25E-07 | 1        | 3                         | 7.77E-04         |
| 19181379-Table2                            | 1        | 3.84E-10 | 1            | 1        | 1        | 1        | 1        | 1        | 1        | 1.05E-11 | 1        | 2                         | 1.13E-03         |
| 16434974-Table1                            | 1        | 1        | 1            | 5.06E-06 | 1        | 1        | 1        | 1        | 1        | 8.45E-06 | 1        | 2                         | 4.00E-03         |
| 16909110-Table1                            | 1        | 2.04E-06 | 1            | 1        | 1        | 1        | 1        | 6.54E-08 | 1        | 1        | 1        | 2                         | 2.21E-09         |
| OLSSON_E2F3_TARGETS_DN                     | 1        | 9.69E-08 | 1            | 1        | 1        | 1        | 1        | 3.08E-09 | 1        | 1        | 1        | 2                         | 1.55E-10         |

|                                            |   |          |   |   |   |   |   |   |   |   |          |   |   |          |
|--------------------------------------------|---|----------|---|---|---|---|---|---|---|---|----------|---|---|----------|
| KOBAYASHI_EGFR_SIGNALING_24HR_UP           | 1 | 8.47E-06 | 1 | 1 | 1 | 1 | 1 | 1 | 1 | 1 | 2.02E-08 | 1 | 2 | 1.20E-04 |
| GSE12845_IGD_POS_VS_NEG_BLOOD_BCELL_UP     | 1 | 1.15E-05 | 1 | 1 | 1 | 1 | 1 | 1 | 1 | 1 | 1.25E-07 | 1 | 2 | 1.29E-03 |
| GSE12845_IGD_POS_BLOOD_VS_NAIVE_TONSIL_BCE | 1 | 1.15E-05 | 1 | 1 | 1 | 1 | 1 | 1 | 1 | 1 | 1.69E-04 | 1 | 2 | 1.01E-05 |
| GSE22886_CTRL_VS_LPS_24H_DC_DN             | 1 | 1.15E-05 | 1 | 1 | 1 | 1 | 1 | 1 | 1 | 1 | 4.96E-06 | 1 | 2 | 1.34E-03 |
